# Supplementary material for: Post-campaign coverage evaluation of a measles and rubella supplementary immunization activity in five districts in India, 2019–2020
Source: PubMed Central journal article supplement (PMC10980234; doi:10.1371/journal.pone.0297385), 2024-03-29
Supplement: pone.0297385.s013.pdf [file pone.0297385.s013.pdf]

Supplementary Table 9. Reasons for not receiving the campaign vaccine, children aged 9 months to less than 15 years, restricted to children aware of the campaign

| Site                        | N   | Lack of knowledge of campaign | Lack of faith in vaccines or vaccine campaigns | Lack of time or other issue | Private provider or provider advised against campaign | Fear of pain and other side effects or fear of vaccines | Heard from social media vaccine may harm child | Heard from news or community member vaccine may harm | School opted out | Child sick | Did not live in state during MR campaign | Dont remember | Other |
|-----------------------------|-----|-------------------------------|------------------------------------------------|-----------------------------|-------------------------------------------------------|---------------------------------------------------------|------------------------------------------------|------------------------------------------------------|------------------|------------|------------------------------------------|---------------|-------|
| Thiruvananthapuram, Kerala  | 54  | 16.7                          | 5.6                                            | 1.9                         | 11.1                                                  | 9.3                                                     | 5.6                                            | 1.9                                                  | 3.7              | 11.1       | 7.4                                      | 16.7          | 9.3   |
| Kanpur Nagar, Uttar Pradesh | 110 | 7.3                           | 7.3                                            | 10.9                        | 2.7                                                   | 24.5                                                    | 0.9                                            | 8.2                                                  |                  | 15.5       | 21.8                                     |               | 0.9   |
| Palghar, Maharashtra        | 13  |                               |                                                | 7.7                         | 15.4                                                  | 7.7                                                     |                                                | 7.7                                                  |                  | 7.7        | 30.8                                     | 15.4          | 7.7   |
| Hoshiarpur, Punjab          | 26  | 19.2                          | 23.1                                           |                             |                                                       |                                                         | 23.1                                           |                                                      | 11.5             | 11.5       | 7.7                                      |               | 3.8   |
| Dibrugarh, Assam            | 46  | 28.3                          |                                                | 4.3                         |                                                       | 4.3                                                     |                                                |                                                      |                  | 26.1       | 4.3                                      | 17.4          | 15.2  |
| All Sites                   | 249 | 14.1                          | 6.8                                            | 6.4                         | 4.4                                                   | 14.1                                                    | 4                                              | 4.4                                                  | 2                | 15.7       | 14.5                                     | 7.6           | 6     |

Other includes service delivery issue and heard vaccine may cause harm from religious leader.

Table is restricted to children whose caregivers reported being aware of the campaign. When asked why the child had not received the MR campaign dose in a subsequent question some caregivers indicated lack of knowledge about the campaign as the reason. This may have included situations where the caregiver was aware of the campaign but was not aware of the logistics such as when or where to have their child vaccinated.
